# Supplementary material for: Accurate ab initio based global adiabatic potential energy surfaces for the 13A′′, 13A′ and 21A′ states of SiH2
Source: Royal Society of Chemistry journal article supplement (doi:10.1039/d2cp04808f), 2022-11-22
Supplement: d2cp04808f1.pdf [file d2cp04808f1.pdf]

## Supplementary Material

**Table 1** 9 geometric reference coordinates and 9 nonlinear parameters for three excited states

|                                     | $1^3A''$  |           |           | $1^3A'$   |           |           | $2^1A'$   |           |           |
|-------------------------------------|-----------|-----------|-----------|-----------|-----------|-----------|-----------|-----------|-----------|
|                                     | $P^{(1)}$ | $P^{(2)}$ | $P^{(3)}$ | $P^{(1)}$ | $P^{(2)}$ | $P^{(3)}$ | $P^{(1)}$ | $P^{(2)}$ | $P^{(3)}$ |
| $\gamma_1^{(j)} / \alpha_0^{-1}$    | 0.4       | 0.8       | 0.8       | 0.6       | 1.1       | 1.1       | 2.0       | 1.0       | 1.0       |
| $\gamma_2^{(j)} / \alpha_0^{-1}$    | 1.3       | 1.0       | 1.0       | 1.9       | 2.0       | 2.0       | 0.5       | 1.4       | 1.4       |
| $\gamma_3^{(j)} / \alpha_0^{-1}$    | 0.7       | 0.6       | 0.6       | 0.5       | 0.5       | 0.5       | 0.2       | 0.7       | 0.7       |
| $R_{1,\text{ref}}^{(j)} / \alpha_0$ | 5.0       | 4.0       | 4.0       | 2.0       | 5.0       | 5.0       | 2.0       | 5.0       | 5.0       |
| $R_{2,\text{ref}}^{(j)} / \alpha_0$ | 3.0       | 3.0       | 3.0       | 3.0       | 3.0       | 4.0       | 4.0       | 4.0       | 4.0       |
| $R_{3,\text{ref}}^{(j)} / \alpha_0$ | 5.0       | 3.0       | 3.0       | 5.0       | 2.5       | 2.5       | 5.0       | 5.0       | 5.0       |

**Table 2** 150 linear coefficients of  $1^3A''$  state

| Coefficients      | $P^{(1)}$     | $P^{(2)}$     | $P^{(3)}$     |
|-------------------|---------------|---------------|---------------|
| $C_1/a_0^0$       | 0.1270721069  | -0.0866997319 | 0.0126999242  |
| $C_2/a_0^{-1}$    | -0.0138029605 | 0.1070564802  | -0.2009634644 |
| $C_3/a_0^{-1}$    | -0.1458595851 | -0.0086054983 | -0.0473640508 |
| $C_4/a_0^{-2}$    | -0.0116244092 | 0.0389554994  | -0.0127787232 |
| $C_5/a_0^{-2}$    | 0.0008031827  | -0.0011487759 | 0.0327687688  |
| $C_6/a_0^{-2}$    | 0.0219606283  | -0.0244163656 | -0.0239714433 |
| $C_7/a_0^{-2}$    | -0.0734572307 | -0.0881194104 | -0.0124604107 |
| $C_8/a_0^{-3}$    | -0.0322232727 | 0.0000882095  | -0.0014502715 |
| $C_9/a_0^{-3}$    | 0.0019515813  | -0.0010833004 | 0.0021212340  |
| $C_{10}/a_0^{-3}$ | 0.0037408155  | -0.0012242468 | -0.0037727714 |
| $C_{11}/a_0^{-3}$ | -0.0035350614 | -0.0030937534 | -0.0001958165 |
| $C_{12}/a_0^{-3}$ | -0.0019653374 | 0.0001181815  | 0.0044561897  |
| $C_{13}/a_0^{-3}$ | 0.0021868348  | -0.0044783403 | -0.0012017187 |
| $C_{14}/a_0^{-4}$ | -0.0005492772 | 0.0007075458  | -0.0023555748 |
| $C_{15}/a_0^{-4}$ | -0.0043644692 | -0.0091085537 | 0.0053397610  |
| $C_{16}/a_0^{-4}$ | -0.0014153885 | 0.0002535352  | 0.0021026491  |
| $C_{17}/a_0^{-4}$ | 0.0001390463  | -0.0001413697 | 1.0074393851  |
| $C_{18}/a_0^{-4}$ | 0.3055289149  | 0.4157788867  | 0.7265564411  |
| $C_{19}/a_0^{-4}$ | 0.5728655976  | 0.4212240606  | -0.2182001149 |

|                   |               |               |               |
|-------------------|---------------|---------------|---------------|
| $C_{20}/a_0^{-4}$ | 0.1199964410  | 0.1455336100  | 0.0622636028  |
| $C_{21}/a_0^{-4}$ | 0.4739083546  | -0.0899036869 | 0.2254960970  |
| $C_{22}/a_0^{-4}$ | 0.1389782677  | 0.1742362586  | 0.1061356633  |
| $C_{23}/a_0^{-5}$ | -0.0929283012 | 0.1541335943  | -0.1269887985 |
| $C_{24}/a_0^{-5}$ | -0.0109408007 | 0.0206685516  | -0.0865054606 |
| $C_{25}/a_0^{-5}$ | 0.0003475608  | 0.0302479364  | -0.0293526837 |
| $C_{26}/a_0^{-5}$ | -0.0101950207 | 0.0275752876  | 0.0573519943  |
| $C_{27}/a_0^{-5}$ | -0.0637195859 | 0.0064979995  | -0.0275222760 |
| $C_{28}/a_0^{-5}$ | 0.0031669257  | 0.0597574129  | -0.0180981126 |
| $C_{29}/a_0^{-5}$ | 0.0037809014  | -0.0138671588 | -0.0149524380 |
| $C_{30}/a_0^{-5}$ | 0.0024793128  | -0.0054938161 | 0.0034559352  |
| $C_{31}/a_0^{-5}$ | 0.0033780868  | 0.0027476042  | -0.0131912047 |
| $C_{32}/a_0^{-5}$ | 0.0266901209  | -0.0110793523 | 0.0120177122  |
| $C_{33}/a_0^{-5}$ | 0.0121019164  | 0.0008124225  | 0.0038859592  |
| $C_{34}/a_0^{-5}$ | -0.0053599477 | -2.6098340776 | 0.8562778550  |
| $C_{35}/a_0^{-6}$ | -4.0451324551 | -0.2408268329 | -1.5289613815 |
| $C_{36}/a_0^{-6}$ | 0.9881079353  | 1.4646375495  | 0.2099649550  |
| $C_{37}/a_0^{-6}$ | 0.1281343678  | -0.2377806395 | -0.4661687749 |
| $C_{38}/a_0^{-6}$ | -0.0690439180 | -1.0854767606 | -0.0016848069 |
| $C_{39}/a_0^{-6}$ | -0.0620243412 | -0.1818672821 | -0.0120281957 |
| $C_{40}/a_0^{-6}$ | 0.1972922370  | 0.1110501712  | -0.0220839263 |
| $C_{41}/a_0^{-6}$ | -0.0658809430 | 0.2074544129  | 0.0113442640  |
| $C_{42}/a_0^{-6}$ | 0.0234080676  | -0.0211092158 | -0.0005513674 |
| $C_{43}/a_0^{-6}$ | -0.0239762431 | 0.0060465614  | -0.0113953912 |
| $C_{44}/a_0^{-6}$ | 0.0033057338  | 0.0010957308  | 0.0220907599  |
| $C_{45}/a_0^{-6}$ | -0.0377172936 | 0.0055885170  | -0.0010197302 |
| $C_{46}/a_0^{-6}$ | 0.0015419222  | 0.0006475648  | -0.0009441139 |
| $C_{47}/a_0^{-6}$ | -0.0002024564 | -0.0003667594 | -0.0001401027 |
| $C_{48}/a_0^{-6}$ | 0.0026810569  | -0.0007552860 | 0.0002067691  |
| $C_{49}/a_0^{-6}$ | -0.0010234551 | -0.0029940227 | -0.0052644019 |
| $C_{50}/a_0^{-6}$ | -0.0028813990 | -0.0021731194 | 0.0007890170  |

**Table 3** 150 linear coefficients of  $1^3A'$  state

| Coefficients   | $P^{(1)}$     | $P^{(2)}$     | $P^{(3)}$     |
|----------------|---------------|---------------|---------------|
| $C_1/a_0^0$    | -0.1280101736 | -0.0368487554 | -0.0630109968 |
| $C_2/a_0^{-1}$ | -0.0560572316 | -0.0575327328 | 0.0250159318  |
| $C_3/a_0^{-1}$ | -0.0085975812 | -0.0145041570 | -0.0033138403 |
| $C_4/a_0^{-2}$ | 0.0004568096  | -0.0158756471 | -0.0002332552 |
| $C_5/a_0^{-2}$ | -0.0271608641 | -0.0088618006 | -0.0087699125 |
| $C_6/a_0^{-2}$ | -0.0153847156 | 0.0147944255  | 0.0005815977  |
| $C_7/a_0^{-2}$ | 0.0124919586  | -0.0123794709 | 0.0059347892  |
| $C_8/a_0^{-3}$ | 0.0030363558  | -0.0018814996 | 0.0000486472  |

|                   |               |               |               |
|-------------------|---------------|---------------|---------------|
| $C_9/a_0^{-3}$    | -0.0008874994 | 0.0076135697  | -0.0016260035 |
| $C_{10}/a_0^{-3}$ | -0.0010678952 | -0.0003992642 | -0.0049185855 |
| $C_{11}/a_0^{-3}$ | 0.0121297511  | 0.0053414908  | 0.0055171320  |
| $C_{12}/a_0^{-3}$ | 0.0009381301  | -0.0001466973 | -0.0004258014 |
| $C_{13}/a_0^{-3}$ | 0.0000415321  | 0.0016272963  | 0.0000178427  |
| $C_{14}/a_0^{-4}$ | -0.0006164771 | -0.0002330745 | 0.0004246359  |
| $C_{15}/a_0^{-4}$ | -0.0012132501 | -0.0023593314 | 0.0027634645  |
| $C_{16}/a_0^{-4}$ | 0.0014227902  | 0.0007128384  | 0.0009401598  |
| $C_{17}/a_0^{-4}$ | -0.0000826338 | -0.0003688401 | -0.0068748209 |
| $C_{18}/a_0^{-4}$ | -0.0120752190 | 0.0110283818  | -0.0235568119 |
| $C_{19}/a_0^{-4}$ | 0.0114066537  | 0.0047258424  | 0.0098436457  |
| $C_{20}/a_0^{-4}$ | -0.0271386739 | 0.0174341050  | 0.0033072198  |
| $C_{21}/a_0^{-4}$ | 0.0011663055  | 0.0261210778  | -0.0023279861 |
| $C_{22}/a_0^{-4}$ | -0.0188932770 | 0.0085720744  | -0.0138883353 |
| $C_{23}/a_0^{-5}$ | 0.0103612548  | 0.0036980397  | 0.0252635952  |
| $C_{24}/a_0^{-5}$ | 0.0107728156  | -0.0062414155 | -0.0086172353 |
| $C_{25}/a_0^{-5}$ | -0.0077590533 | -0.0017867562 | -0.0145922864 |
| $C_{26}/a_0^{-5}$ | 0.0116965246  | -0.0049795901 | 0.0055163452  |
| $C_{27}/a_0^{-5}$ | 0.0143526951  | 0.0174614486  | -0.0091441878 |
| $C_{28}/a_0^{-5}$ | -0.0111747071 | 0.0022369536  | -0.0030438797 |
| $C_{29}/a_0^{-5}$ | -0.0010763077 | -0.0016520682 | -0.0038723900 |
| $C_{30}/a_0^{-5}$ | 0.0040251695  | -0.0022675673 | -0.0001791827 |
| $C_{31}/a_0^{-5}$ | -0.0004083692 | 0.0009654301  | 0.0034966002  |
| $C_{32}/a_0^{-5}$ | 0.0070809480  | -0.0032298797 | -0.0023945408 |
| $C_{33}/a_0^{-5}$ | 0.0004735595  | -0.0017600160 | 0.0007787468  |
| $C_{34}/a_0^{-5}$ | -0.0001874990 | 2.3039723719  | 0.2748679302  |
| $C_{35}/a_0^{-6}$ | -0.5353350868 | 0.1643535182  | -0.0347001261 |
| $C_{36}/a_0^{-6}$ | 0.2126307578  | 0.1108878803  | 0.0308226534  |
| $C_{37}/a_0^{-6}$ | 0.0652550857  | -0.0892837142 | -0.0846438586 |
| $C_{38}/a_0^{-6}$ | -0.1365982492 | -0.2176812565 | -0.0027495660 |
| $C_{39}/a_0^{-6}$ | -0.0504268989 | -0.0419112086 | 0.0138410788  |
| $C_{40}/a_0^{-6}$ | 0.0226042646  | 0.0192638104  | 0.1192753758  |
| $C_{41}/a_0^{-6}$ | -0.0337355793 | 0.0399188618  | -0.0001742452 |
| $C_{42}/a_0^{-6}$ | 0.0011225676  | 0.0137591096  | -0.0007257900 |
| $C_{43}/a_0^{-6}$ | -0.0038933976 | 0.0005033593  | 0.0014769713  |
| $C_{44}/a_0^{-6}$ | -0.0207962783 | 0.0094204601  | -0.0089954531 |
| $C_{45}/a_0^{-6}$ | -0.0048292299 | 0.0050937672  | 0.0002995796  |
| $C_{46}/a_0^{-6}$ | -0.0003848672 | -0.0004212585 | -0.0003918450 |
| $C_{47}/a_0^{-6}$ | 0.0006271773  | 0.0001939424  | -0.0003236810 |
| $C_{48}/a_0^{-6}$ | 0.0004915903  | -0.0004841372 | -0.0012048962 |
| $C_{49}/a_0^{-6}$ | -0.0010031261 | 0.0011316840  | 0.0013970664  |
| $C_{50}/a_0^{-6}$ | -0.0004931415 | -0.0008294667 | -0.0005766723 |

---

Table 4 150 linear coefficients of  $2^1A'$  state

| Coefficients      | $P^{(1)}$     | $P^{(2)}$     | $P^{(3)}$     |
|-------------------|---------------|---------------|---------------|
| $C_1/a_0^0$       | -0.0397016382 | 0.0142239429  | -0.0398558247 |
| $C_2/a_0^{-1}$    | -0.0260308093 | -0.0416386675 | -0.0442248487 |
| $C_3/a_0^{-1}$    | 0.0335920039  | 0.0079671315  | -0.0217838952 |
| $C_4/a_0^{-2}$    | -0.0130896322 | -0.0061226658 | 0.0177436783  |
| $C_5/a_0^{-2}$    | -0.0539975034 | -0.0044557110 | -0.0074580004 |
| $C_6/a_0^{-2}$    | -0.0246892513 | -0.0034887170 | -0.0014482422 |
| $C_7/a_0^{-2}$    | -0.0047754299 | -0.0436451506 | -0.0108771073 |
| $C_8/a_0^{-3}$    | 0.0210433974  | 0.0011780209  | -0.0014972606 |
| $C_9/a_0^{-3}$    | -0.0187990602 | -0.0027063370 | -0.0114901452 |
| $C_{10}/a_0^{-3}$ | 0.0022003899  | -0.0017662849 | -0.0097056317 |
| $C_{11}/a_0^{-3}$ | -0.0110505384 | 0.0162250595  | -0.0170798002 |
| $C_{12}/a_0^{-3}$ | 0.0043407960  | 0.0001208796  | 0.0012359457  |
| $C_{13}/a_0^{-3}$ | -0.0048762489 | -0.0011030971 | -0.0057879428 |
| $C_{14}/a_0^{-4}$ | -0.0015200075 | -0.0006028042 | 0.0002648752  |
| $C_{15}/a_0^{-4}$ | 0.0002926224  | -0.0005614396 | -0.0028490910 |
| $C_{16}/a_0^{-4}$ | 0.0052306161  | -0.0081200164 | 0.0022048386  |
| $C_{17}/a_0^{-4}$ | -0.0032195094 | 0.0003864183  | 0.1826993331  |
| $C_{18}/a_0^{-4}$ | 0.0294506073  | -0.0111466920 | 0.0888660165  |
| $C_{19}/a_0^{-4}$ | 0.1106405967  | -0.1498966625 | 0.0526089288  |
| $C_{20}/a_0^{-4}$ | 0.0059894166  | 0.0288843299  | 0.0018187545  |
| $C_{21}/a_0^{-4}$ | -0.0394138815 | 0.0049470995  | -0.0098822129 |
| $C_{22}/a_0^{-4}$ | 0.0081683870  | 0.0087725995  | 0.0174195129  |
| $C_{23}/a_0^{-5}$ | -0.0120753292 | -0.0403207129 | -0.0365245199 |
| $C_{24}/a_0^{-5}$ | -0.0060490209 | 0.0142094440  | 0.0323325642  |
| $C_{25}/a_0^{-5}$ | -0.0008676918 | -0.0036527719 | 0.0018256282  |
| $C_{26}/a_0^{-5}$ | -0.0001257177 | 0.0018292216  | -0.0058829370 |
| $C_{27}/a_0^{-5}$ | -0.0087925796 | 0.0016793432  | 0.0069218440  |
| $C_{28}/a_0^{-5}$ | 0.0133923977  | 0.0010437298  | 0.0017575675  |
| $C_{29}/a_0^{-5}$ | 0.0000962813  | -0.0008209657 | -0.0001865812 |
| $C_{30}/a_0^{-5}$ | 0.0003840169  | -0.0004346910 | 0.0006185679  |
| $C_{31}/a_0^{-5}$ | 0.0000357008  | -0.0008902042 | -0.0014802088 |
| $C_{32}/a_0^{-5}$ | -0.0009177970 | 0.0015199225  | 0.0010783880  |
| $C_{33}/a_0^{-5}$ | 0.0004951134  | 0.0007869384  | 0.0011841157  |
| $C_{34}/a_0^{-5}$ | 0.0014310699  | -0.0007886715 | 0.0050911099  |
| $C_{35}/a_0^{-6}$ | -0.0015029903 | -0.0063115295 | -0.0002167027 |
| $C_{36}/a_0^{-6}$ | 0.0031187952  | -0.0016222832 | 0.0019798092  |
| $C_{37}/a_0^{-6}$ | 0.0015810248  | -0.0001470928 | -0.0039121034 |
| $C_{38}/a_0^{-6}$ | 0.0011754428  | 0.0000663734  | -0.0009776669 |
| $C_{39}/a_0^{-6}$ | -0.0002855216 | 0.0001763161  | -0.0003651695 |
| $C_{40}/a_0^{-6}$ | 0.0032484439  | 0.0006015936  | -0.0001495835 |
| $C_{41}/a_0^{-6}$ | 0.0002996202  | 0.0001690388  | -0.0002322030 |
| $C_{42}/a_0^{-6}$ | 0.0001772829  | -0.0000407228 | -0.0000336905 |

|                   |               |               |               |
|-------------------|---------------|---------------|---------------|
| $C_{43}/a_0^{-6}$ | 0.0000413484  | 0.0000419088  | 0.0001847939  |
| $C_{44}/a_0^{-6}$ | -0.0001847005 | 0.0001628312  | -0.0001252095 |
| $C_{45}/a_0^{-6}$ | -0.0000641009 | 0.0000384508  | -0.0001078951 |
| $C_{46}/a_0^{-6}$ | -0.0000765787 | 0.0000347741  | 0.0001226817  |
| $C_{47}/a_0^{-6}$ | 0.0000084668  | -0.0000087134 | 0.0000071006  |
| $C_{48}/a_0^{-6}$ | 0.0003989773  | 0.0002266374  | -0.0001350852 |
| $C_{49}/a_0^{-6}$ | -0.0000784113 | -0.0000907150 | 0.0000194969  |
| $C_{50}/a_0^{-6}$ | 0.0000086382  | -0.0000294080 | -0.0000071673 |

---
